# Supplementary material for: A high concentration of genistein down-regulates activin A, Smad3 and other TGF-β pathway genes in human uterine leiomyoma cells
Source: PubMed Central journal article supplement — Exp Mol Med. 2012 Jan 6;44(4):281–92. doi: 10.3858/emm.2012.44.4.024 (PMC3349910; doi:10.3858/emm.2012.44.4.024), 2012-01-06
Supplement: emm-44-281-s001.pdf [file emm-44-281-s001.pdf]

**Table 1**

|                        | Target genes               | Primer                                     | Sequence(5'→3')                                 | Amplicon length (bp) |
|------------------------|----------------------------|--------------------------------------------|-------------------------------------------------|----------------------|
| Cell Cycle Regulation  |                            |                                            |                                                 |                      |
|                        | CDK6                       | Forward (326-345)<br>Reverse (367-386)     | ctccacatcatggaccacag<br>aggccaagttgggagtggg     | 61                   |
|                        | P15                        | Forward (613-633)<br>Reverse (707-725)     | ttgtacaggagtctccgttg<br>gtgagagtggcagggtctg     | 113                  |
|                        | Cyclin B2                  | Forward (396-415)<br>Reverse (434-455)     | tggaaaagttggctcaaag<br>cttcctcatggagacatctc     | 60                   |
|                        | A-myb                      | Forward (481-501)<br>Reverse (537-554)     | ctcctttaagaatgcgcttg<br>agcaagtggctgggacac      | 74                   |
| TGF- $\beta$ Signaling |                            |                                            |                                                 |                      |
|                        | TGF- $\beta$ 2 (no intron) | Forward (1169-1189)<br>Reverse (1224-1245) | aggaaggggtgaagtgctagt<br>ccaacgatcaaattgtactgct | 77                   |
|                        | Smad3                      | Forward (704-724)<br>Reverse (756-775)     | ccccagcacataataacttg<br>aggagatggagcaccagaag    | 72                   |
|                        | Activin A (no intron)      | Forward (1138-1157)<br>Reverse (1226-1248) | agtcaccctgaaaaccaca<br>caacagcttctcagtgatacagg  | 111                  |
|                        | Activin B                  | Forward (1196-1213)<br>Reverse (1248-1267) | atcagcttcgccgagaca<br>gccttcgttgagatgaaga       | 72                   |
